# Supplementary material
Source: PubMed Central journal article supplement (PMC6484144)
Supplement: supp_RA119.007626_143193_1_supp_289325_pn85bh.pdf [file supp_RA119.007626_143193_1_supp_289325_pn85bh.pdf]

Voltage-dependent activation in EAG channels follows a ligand-receptor rather than a mechanical-lever mechanism

**Olfat A. Malak<sup>1#</sup>, Grigory S. Gluhov<sup>2</sup>, Anastasia V. Grizel<sup>3</sup>, Kseniya S. Kudryashova<sup>2,4</sup>,  
Olga S. Sokolova<sup>2,§</sup>, Gildas Loussouarn<sup>1,§\*</sup>**

Running Title: Voltage-dependent gating mechanism of EAG channels

*# present address: Cardiovascular Institute, Stanford University, 300 Pasteur Drive, Stanford, CA 94305-5111*

*From the <sup>1</sup>INSERM, CNRS, l'Institut du Thorax, Université de Nantes, 44007, Nantes, France ;  
<sup>2</sup>Moscow M.V. Lomonosov State University, Moscow 119234, Russia; <sup>3</sup>Saint Petersburg State University, Saint Petersburg 199034, Russia; <sup>4</sup>Shemyakin-Ovchinnikov Institute of Bioorganic Chemistry of Russian Academy of Sciences, Moscow, 117997, Russia*

*§ These authors contributed equally to this work.*

*\*To whom correspondence should be addressed: Dr. Gildas Loussouarn, L'institut du thorax, INSERM UMR 1087 / CNRS UMR 6291, IRS-UN, 8 Quai Moncouso BP 70721, 44007 Nantes cedex 1, France; gildas.loussouarn@inserm.fr; Tel +33 (0)2 2808 0150*

**Keywords:** EAG channel, Kv10.2 channel, voltage dependence, S4-S5 linker, S6 C-terminus, N-CAP, PAS domain, allostery, voltage-gated cation channel

SUPPLEMENTAL FILE

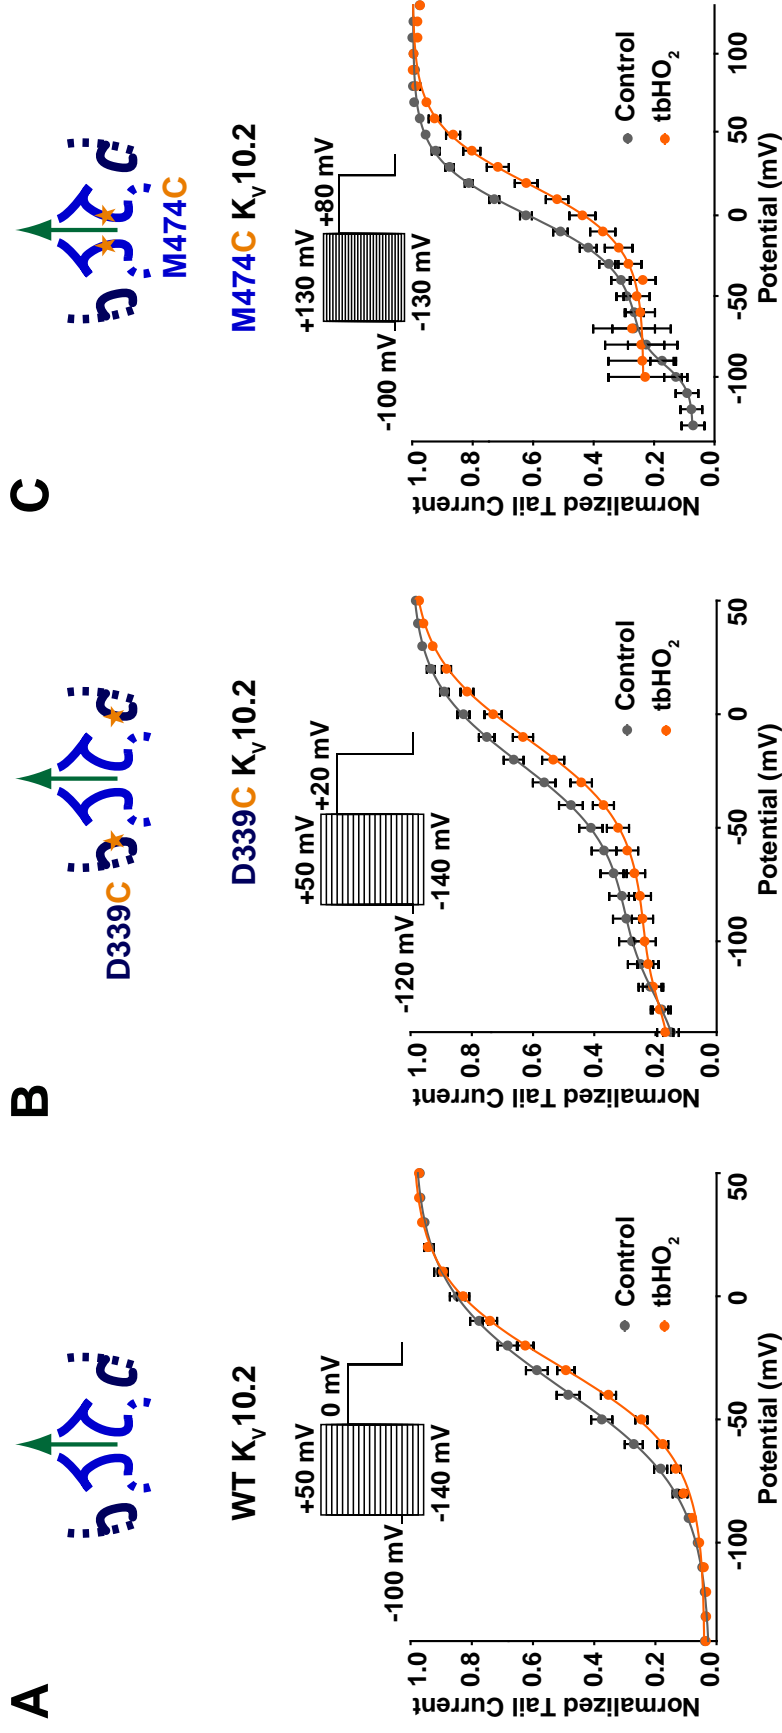

**Supplemental figure 1: activation curve in WT, D339C and M474C  $K_v10.2$ , in presence and absence of 0.2 mM tbHO<sub>2</sub> for 2h. A:** Activation curve of WT  $K_v10.2$ , obtained from recordings as in Figure 2C, after 2h incubation in Tyrode without (control) or with 0.2 mM tbHO<sub>2</sub> (tbHO<sub>2</sub>). **B:** Activation curve of D339C  $K_v10.2$ , obtained from recordings as in Figure 2E, after 2h incubation in Tyrode without (control) or with 0.2 mM tbHO<sub>2</sub> (tbHO<sub>2</sub>). **C:** Activation curve of M474C  $K_v10.2$ , obtained from recordings as in Figure 2G, after 2h incubation in Tyrode without (control) or with 0.2 mM tbHO<sub>2</sub> (tbHO<sub>2</sub>).

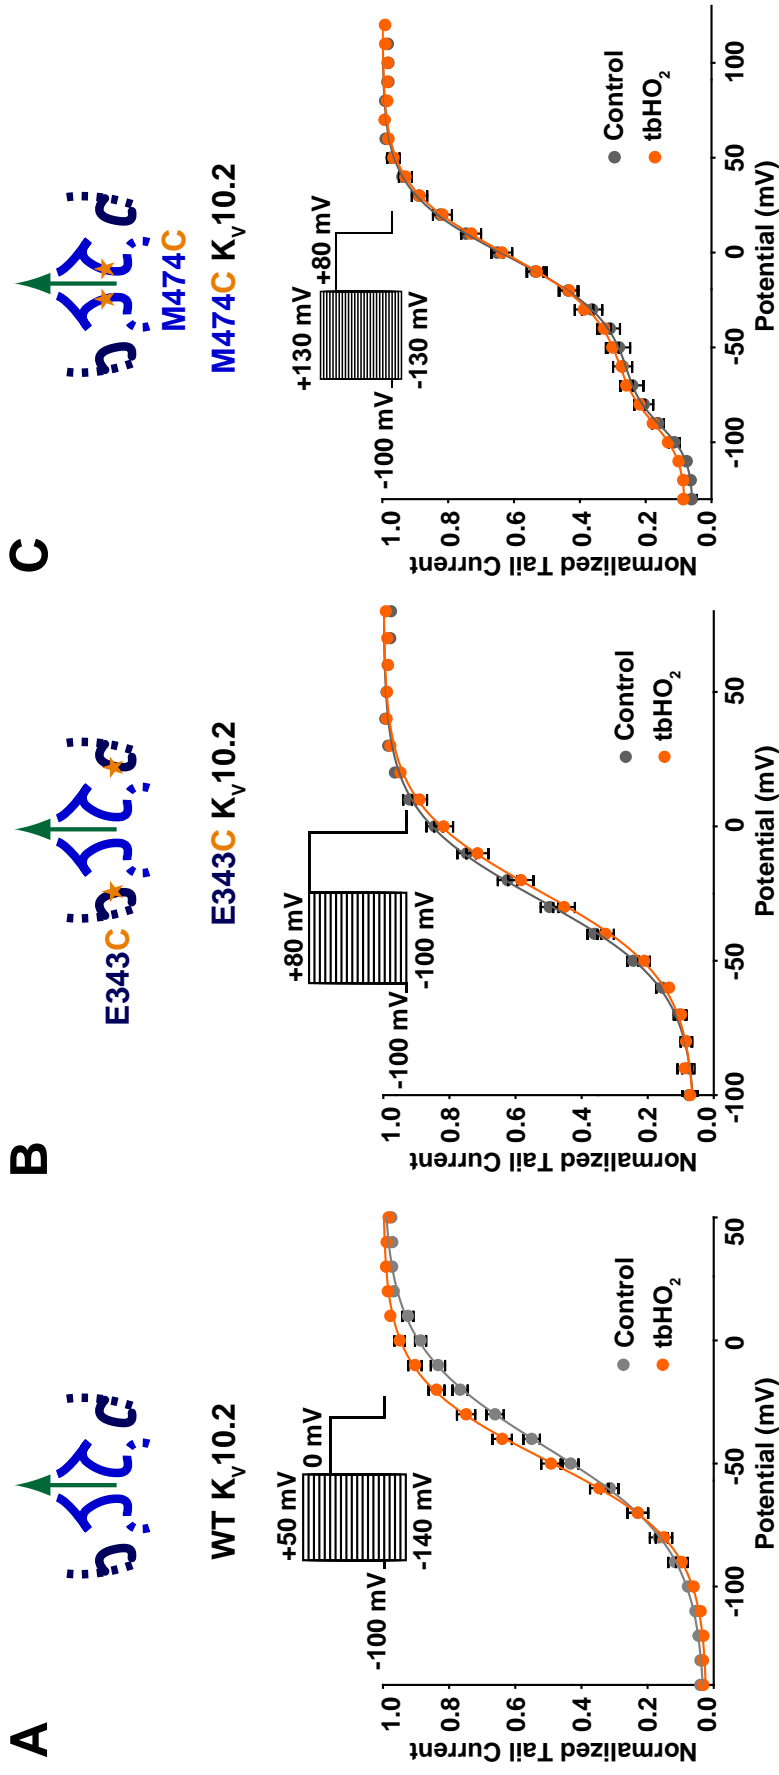

**Supplemental figure 2: activation curve in WT, E343C and M474C  $K_v10.2$ , in presence and absence of 2 mM tbHO<sub>2</sub> for 15 min. A:** Activation curve of WT  $K_v10.2$ , obtained from recordings as in Figure 4C, after 15 minutes incubation in Tyrode without (control) or with 2 mM tbHO<sub>2</sub> (tbHO<sub>2</sub>). **B:** Activation curve of E343C  $K_v10.2$ , obtained from recordings as in Figure 4E, after 15 minutes incubation in Tyrode without (control) or with 2 mM tbHO<sub>2</sub> (tbHO<sub>2</sub>). **C:** Activation curve of M474C  $K_v10.2$ , obtained from recordings as in Figure 4G, after 15 minutes incubation in Tyrode without (control) or with 2 mM tbHO<sub>2</sub> (tbHO<sub>2</sub>).

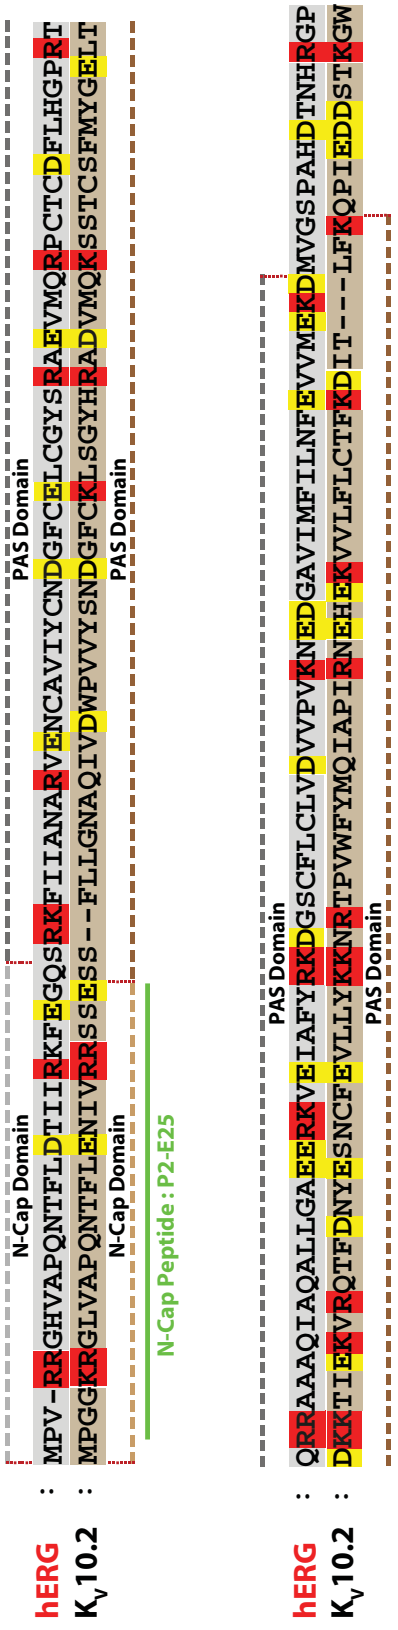

Supplemental figure 3: K<sub>v</sub>10.2 N-Cap and PAS domains. The alignment was obtained using Cobalt (Papadopoulos and Agarwala, 2007).
